# Supplementary material
Source: PubMed Central journal article supplement (PMC9169546)
Supplement: NIHMS1805272-supplement-Supp_Table_E1.pdf [file NIHMS1805272-supplement-Supp_Table_E1.pdf]

**Safety and Immunogenicity of Adjuvanted Recombinant Subunit Herpes Zoster Vaccine  
in Lung Transplant Recipients**

Cedric Hirzel, Arnaud G L'Huillier, Victor H. Ferreira, Tina Marinelli, Terrance Ku, Matthew  
Ierullo, Congrong Miao, D. Scott Schmid, Stephen Juvet, Atul Humar, and Deepali Kumar

**Supporting Information**

## **METHODS**

### **Inclusion and exclusion criteria**

We enrolled the first 50 patients who were willing to participate, had received a single- or double lung transplant and were age  $\geq 50$  years. Detailed inclusion and exclusion criteria are available in the Supporting information. Patients were eligible if they were  $\geq 90$  days post-transplant, had positive varicella zoster IgG antibodies before transplantation, and were able to provide informed consent. We excluded patients who had treatment for allograft rejection during the past 30 days, had treatment with rituximab in the preceding six months or were anticipated to receive rituximab, had treatment with intravenous immunoglobulins (IVIG) in the preceding 30 days or were anticipated to receive IVIG, had plasmapheresis in the preceding 30 days or were anticipated to have plasmapheresis, had a history of a severe allergic reaction (anaphylactic reaction) after any vaccine, had a HZ episode during the past 12 months, had ongoing CMV viremia ( $\geq 200$  IU/mL), were HIV positive, had a congenital immunodeficiency, had a febrile illness during the past 7 days or were unable to comply with the study protocol. The study protocol did not interdict the administration of other non-VZV vaccines during the study period. The institutional research ethics board approved the study (#17-6247).

### **Assessment of anti-gE antibody avidity**

The antibody avidity describes the strength with which an antibody binds to an antigen. Diethylamine (DEA) is a mild protein-denaturing agent. If DEA is added to antibody-antigen mixture antibodies of low avidity (antibodies with weak binding to antigens) are more likely to dissociate from the antibody-antigen complexes than those of higher avidity; this effect can be used for determining the antibody avidity which is expressed as avidity index (AI). Avidity index (AI), expressed in percentage, was calculated as the result of OD of wells washed with

PBS- diethylamine (DEA+), divided by the OD of wells washed with PBS (DEA-), and multiplied by 100, based on the formula;  $AI = OD (DEA+) / OD (DEA-) \times 100$  (high values indicate highly avid antibodies).

### **Assessment of cell mediated immune response**

In order to assess the cell mediated immune response we modified previously described methods <sup>1,2</sup>. Peripheral blood mononuclear cells (PBMCs) were isolated from whole blood using Ficoll gradient centrifugation (GE Healthcare Life Science, Issaquah, WA, USA) and cryopreserved in fetal bovine serum (Gibco, Thermo Fisher Scientific, Waltham, MA, USA) with 10% dimethyl sulfoxide (DMSO) (Fisher BioReagents, Thermo Fisher Scientific). After thawing and washing twice, a target count of  $1 \times 10^6$  (and a minimum of  $5 \times 10^5$ ) viable PBMCs were added to RPMI media plus L-glutamine (Wisent Bioproducts, Quebec, Canada) supplemented with 10% fetal bovine serum, 100 IU/ml penicillin, 100  $\mu$ g/ml streptomycin sulfate, 1% MEM nonessential amino acids, 100 mM sodium pyruvate, 50 mM 2-mercaptoethanol (all Gibco, Thermo Fisher Scientific, Waltham, MA, USA) in 96-well plates. The PBMC were stimulated with a pool of 153 15-mer peptides (1.25  $\mu$ g/mL each, overlapping by 11 amino acids) which span the entire VZV gE protein (JPT Peptide Technologies, Berlin, Germany) in combination with the BD FastImmune™ anti-human CD28/CD49d co-stimulatory reagent (BD Biosciences, Mississauga, ON, Canada) for 2 hours, before addition Brefeldin A (1  $\mu$ g/mL; BioLegend, San Diego, CA) and incubation for an additional 18 hours at 37°C. Positive (PMA/Ionomycin, eBioscience, Thermo Fisher Scientific, Waltham, MA, USA) and negative controls (unstimulated) were included in each assay. Following incubation, cells were washed and stained with the Zombie Aqua™ viability dye (BioLegend, San Diego, CA). After Fc receptor blocking using Human BD Fc Block (BD Biosciences, Mississauga, ON, Canada), cells were incubated with a cell-surface staining cocktail consisting of mouse anti-human CD45 (clone HI30)-PerCP/Cy5.5 (Biolegend, San

Diego, CA), mouse anti-human CD3 (clone OKT3)-BV786 mouse anti-human CD4 (clone RPA-T4)-Pacific Blue and mouse anti-human CD8 (clone SK1)-APC-Cy7 (all BD Biosciences, Mississauga, ON, Canada). Following fixation (Fixation Buffer, Biolegend, San Diego, CA) and permeabilization (Intracellular Staining Permeabilization Wash Buffer, Biolegend, San Diego, CA), intracellular staining with mouse anti-human interferon (IFN)- $\gamma$  (clone B27)-FITC, mouse anti-human tumor-necrosis factor (TNF)- $\alpha$  (clone MAb11)-PE-Cy7, rat anti-human interleukin (IL)-2 (clone MQ1-17H12)-APC and mouse anti-human CD154 (CD40L) (clone 24-31)-PE (all BD Biosciences, Mississauga, ON, Canada) was performed. Flow cytometry was done on a BD LSR II (BD Biosciences, Mississauga, ON, Canada) cytometer at the SickKids-UHN Flow and Mass Cytometry Facility (Toronto, Ontario, Canada) with a target event count of 100,000 live, CD45+ cells. Data was analyzed using FlowJo software v10 (FlowJo LLC, Ashland, OR, USA). To account for background cytokine production, the frequency of cytokine-producing T-cells obtained in the unstimulated specimen was subtracted from the frequency obtained in the stimulated specimen. Cell mediated immune responses were expressed as the frequency of viable CD4 T-cells expressing two or more activation markers (CD4<sup>2+</sup> T-cells) among tumor necrosis factor alpha (TNF- $\alpha$ ), interferon gamma (IFN- $\gamma$ ), interleukin-2 (IL-2), and CD40 ligand (CD40L) per 10<sup>6</sup> CD4+ T-cells as previously established by others<sup>3-10</sup>.

### **Grading solicited adverse events**

Redness at injection site: *Grade 1* if diameter < 3cm

*Grade 2* if diameter 3-6 cm

*Grade 3* if diameter >6 cm

Swelling at injection site: *Grade 1* if diameter < 3cm

*Grade 2* if diameter 3-6 cm

*Grade 3* if diameter >6 cm

Symptoms (Pain at injection site, myalgia, fatigue, headache):

*Grade 1* if classified as mild by the patient

*Grade 2* if classified as moderate by the patient

*Grade 3* if classified as severe by the patient

## RESULTS

**Table E1** Unsolicited adverse events

| Adverse event                                                                          | Days after last RZV dose | Treatment                                                                              | Vaccine related  |
|----------------------------------------------------------------------------------------|--------------------------|----------------------------------------------------------------------------------------|------------------|
| Lower respiratory tract infection ( <i>E. coli</i> )                                   | 116                      | Antibiotic treatment (outpatient setting)                                              | Not related      |
| Aspiration pneumonia (pathogen unknown)                                                | 77                       | Antibiotic treatment (outpatient setting)                                              | Not related      |
| Invasive pulmonary aspergillosis ( <i>Aspergillus ustus</i> )                          | 30                       | Antifungal treatment (outpatient setting)                                              | Not related      |
| CMV infection (asymptomatic replication)                                               | 15                       | Antiviral treatment (outpatient setting)                                               | Not related      |
| Gastroenteritis (pathogen unknown)                                                     | 88                       | No specific treatment                                                                  | Not related      |
| Lower respiratory tract infection ( <i>E. coli</i> )                                   | 4                        | Antibiotic treatment (outpatient setting)                                              | Not related      |
| Traveler's diarrhea (southeast Asia, pathogen unknown)                                 | 75                       | No specific treatment                                                                  | Not related      |
| Agranulocytosis                                                                        | 29                       | G-CSF treatment                                                                        | Not related      |
| <i>Clostridium difficile</i> infection                                                 | 6                        | Antibiotic treatment (outpatient setting)                                              | Not related      |
| Impetigo contagiosa (pathogen unknown)                                                 | 19                       | Antibiotic treatment (outpatient setting)                                              | Not related      |
| CMV infection (asymptomatic replication)                                               | 14                       | Antiviral treatment (outpatient setting)                                               | Not related      |
| Shingles (localized)                                                                   | 2                        | Antiviral treatment (outpatient setting)                                               | Not related      |
| Severe adverse event                                                                   | Days after last RZV dose | Treatment                                                                              | Vaccine related  |
| Lower respiratory tract infection (pathogen unknown)                                   | 15                       | Antibiotic treatment (hospital admission)                                              | Not related      |
| Skin cancer (melanoma in situ)                                                         | 12                       | Surgical resection                                                                     | Not related      |
| Shingles (disseminated)                                                                | 32                       | Antiviral treatment (hospital admission)                                               | Not related      |
| Allograft rejection (clinically diagnosed)                                             | 89                       | Methylprednisone (hospital admission)                                                  | Not related      |
| Cellular rejection grade AI (histologically proven)                                    | 17                       | Methylprednisone (hospital admission)                                                  | Possibly related |
| Cellular rejection grade AI (histologically proven)                                    | 90                       | Methylprednisone (hospital admission)                                                  | Not related      |
| CMV infection (viral syndrome)                                                         | 71                       | Antiviral treatment (hospital admission)                                               | Not related      |
| Abdominal aortic aneurysm                                                              | 16                       | Endovascular repair (hospital admission)                                               | Not related      |
| Lower respiratory tract infection (pathogen unknown)                                   | 45                       | Antibiotic treatment (hospital admission)                                              | Not related      |
| Allograft rejection (clinically diagnosed)                                             | 130                      | Anti-thymocyte globulin treatment (hospital admission)                                 | Not related      |
| Congestive heart failure                                                               | 25                       | Optimizing cardiac medication (hospital admission)                                     | Not related      |
| Allograft dysfunction (unknown etiology, histologically not compatible with rejection) | 92                       | Methylprednisone (stopped after histological result was available; hospital admission) | Not related      |
| Bacteremia ( <i>Pseudomonas aeruginosa</i> )                                           | 125                      | Antibiotic treatment (hospital admission)                                              | Not related      |
| Influenza B infection (resulting in death)                                             | 139                      | Antiviral treatment (hospital admission)                                               | Not related      |

## Supplementary References

1. Chlibek R, Smetana J, Pauksens K, et al. Safety and immunogenicity of three different formulations of an adjuvanted varicella-zoster virus subunit candidate vaccine in older adults: a phase II, randomized, controlled study. *Vaccine*. 2014;32(15):1745-1753.
2. Moris P, van der Most R, Leroux-Roels I, et al. H5N1 influenza vaccine formulated with AS03 A induces strong cross-reactive and polyfunctional CD4 T-cell responses. *Journal of clinical immunology*. 2011;31(3):443-454.
3. Berkowitz EM, Moyle G, Stellbrink HJ, et al. Safety and immunogenicity of an adjuvanted herpes zoster subunit candidate vaccine in HIV-infected adults: a phase 1/2a randomized, placebo-controlled study. *The Journal of infectious diseases*. 2015;211(8):1279-1287.
4. Vink P, Delgado Mingorance I, Maximiano Alonso C, et al. Immunogenicity and safety of the adjuvanted recombinant zoster vaccine in patients with solid tumors, vaccinated before or during chemotherapy: A randomized trial. *Cancer*. 2019;125(8):1301-1312.
5. Dagnev AF, Ilhan O, Lee WS, et al. Immunogenicity and safety of the adjuvanted recombinant zoster vaccine in adults with haematological malignancies: a phase 3, randomised, clinical trial and post-hoc efficacy analysis. *The Lancet infectious diseases*. 2019;19(9):988-1000.
6. Vink P, Ramon Torrell JM, Sanchez Fructuoso A, et al. Immunogenicity and Safety of the Adjuvanted Recombinant Zoster Vaccine in Chronically Immunosuppressed Adults Following Renal Transplant: A Phase 3, Randomized Clinical Trial. *Clinical infectious diseases : an official publication of the Infectious Diseases Society of America*. 2020;70(2):181-190.
7. Chlibek R, Bayas JM, Collins H, et al. Safety and immunogenicity of an AS01-adjuvanted varicella-zoster virus subunit candidate vaccine against herpes zoster in adults  $\geq 50$  years of age. *The Journal of infectious diseases*. 2013;208(12):1953-1961.
8. Cunningham AL, Heineman TC, Lal H, et al. Immune Responses to a Recombinant Glycoprotein E Herpes Zoster Vaccine in Adults Aged 50 Years or Older. *The Journal of infectious diseases*. 2018;217(11):1750-1760.

9. Leroux-Roels I, Leroux-Roels G, Clement F, et al. A phase 1/2 clinical trial evaluating safety and immunogenicity of a varicella zoster glycoprotein e subunit vaccine candidate in young and older adults. *The Journal of infectious diseases*. 2012;206(8):1280-1290.
10. Grunning K, Campora L, Douha M, et al. Immunogenicity and Safety of the HZ/su Adjuvanted Herpes Zoster Subunit Vaccine in Adults Previously Vaccinated With a Live Attenuated Herpes Zoster Vaccine. *The Journal of infectious diseases*. 2017;216(11):1343-1351.
